# Supplementary material for: Resilience in Local Housing Policy? Liberal or Restrictive Policy Stances Among Swedish Municipalities Following the Great Migration in the Summer of 2015
Source: Frontiers journal article supplement (doi:10.3389/fpos.2022.885892), 2022-06-20
Supplement: Data_Sheet_1.PDF [file Data_Sheet_1.PDF]

# Supplementary information for *Resilience in local housing policy? Liberal or restrictive policy stances among Swedish municipalities following the European migrant crisis*

by Emma Holmqvist, Kristoffer Jutvik, and Gustav Lidén

In the main article, we use survey data from two years, 2019 and 2020, compiled by the National Board of Housing, Building and Planning (NBHBP). As there are a number of non-respondents in each year (32 in 2019 and 10 in 2020), Tables A1 and A2 below summarize the distribution among the respondents (column 2) and non-respondents (column 4) for each year, respectively. Summarizing the tables, the group of non-respondents mainly consists of smaller municipalities with fewer than 25,000 inhabitants in the data for both 2019 and 2020.

Second, in Table A3, we provide summary statistics of all outcomes displayed in Tables 2 and Table 3 in the main article.

Last, we provide a figure which displays the correlation between the survey answer in the NBHBP data (2021) and data compiled by the County Administrative Board (2019, 2019)

**Table A1:** Analysis of non-respondents 2020

| 2020                         | Respondents   |               | Non-respondents |               |
|------------------------------|---------------|---------------|-----------------|---------------|
|                              | Frequency (r) | Percent       | Frequency (n-r) | Percent       |
| Municipality type            |               |               |                 |               |
| University cities <75,000    | 12            | 4.33          | 1               | 7.69          |
| University cities >75,000    | 15            | 5.42          | 2               | 15.38         |
| Gothenburg                   | 13            | 4.69          |                 |               |
| Malmö                        | 12            | 4.33          |                 |               |
| Stockholm                    | 26            | 9.39          |                 |               |
| Other municipalities <25,000 | 163           | 58.84         | 10              | 76.92         |
| Other municipalities >25,000 | 36            | 13.00         |                 |               |
| <b>Total</b>                 | <b>277</b>    | <b>100.00</b> | <b>13</b>       | <b>100.00</b> |

*Notes:* The table summarizes the group of survey respondents (r) and the group of non-respondents (n-r) for 2020. Data from NBHBP (2021).

**Table A2:** Analysis of non-respondents 2019

| 2019                         | Respondents   |               | Non-respondents |               |
|------------------------------|---------------|---------------|-----------------|---------------|
|                              | Frequency (r) | Percent       | Frequency (n-r) | Percent       |
| Municipality type            |               |               |                 |               |
| University cities <75,000    | 12            | 4.65          | 1               | 3.13          |
| University cities >75,000    | 16            | 6.20          | 1               | 3.13          |
| Gothenburg                   | 11            | 4.26          | 2               | 6.25          |
| Malmö                        | 12            | 4.65          |                 |               |
| Stockholm                    | 25            | 9.69          | 1               | 3.13          |
| Other municipalities <25,000 | 150           | 58.14         | 23              | 71.88         |
| Other municipalities >25,000 | 32            | 12.40         | 4               | 12.50         |
| <b>Total</b>                 | <b>258</b>    | <b>100.00</b> | <b>32</b>       | <b>100.00</b> |

*Notes:* The table summarizes the group of survey respondents (r) and the group of non-respondents (n-r) for 2020. Data from NBHBP (2021).

**Table A3:** Summary statistics outcomes

| Variables                                   | Mean  | SD   | Min  | Max   |
|---------------------------------------------|-------|------|------|-------|
| Rentals per 1,000 inhabitants, 2019         | 160.0 | 44.8 | 34.4 | 284.3 |
| Public housing per 1,000 inh., 2018         | 77.4  | 30.3 | 8.18 | 158.3 |
| Vacant apartments, 2019                     | 1     | 1.70 | 0    | 13.4  |
| Prior reception per 1,000 inh., before 2016 | 2.66  | 2.22 | 0.14 | 21.5  |
| Unemployment, 2019                          | 5.73  | 1.98 | 2.30 | 12.9  |
| Left-wing government, 2018                  | 0.13  | 0.34 | 0    | 1     |
| Right-wing government, 2018                 | 0.46  | 0.50 | 0    | 1     |
| Mixed blocs, 2018                           | 0.39  | 0.49 | 0    | 1     |
| Other political government, 2018            | 0.46  | 0.50 | 0    | 1     |

*Notes:* Table displays summary statistics of a) rentals per 1,000 inhabitants in 2019 (Kolada, 2021), b) public housing per 1,000 inhabitants in 2018 (Kolada, 2021), c) the percentage of vacant apartments in 2019 (Statistics Sweden, 2021), d) prior reception before 2016 (SMA, 2021), and e) the percentage of unemployment in 2019 (Kolada, 2021) across the policy categories stipulated in Figure 1. Column 7 shows the difference between column 2 (no long-term policy) and column 6 (permanent housing). Data on housing policy from NBHBP (2021).

**Figure A1:** Comparing the answers in the surveys by NBHBP and the County Administrative Board 2020

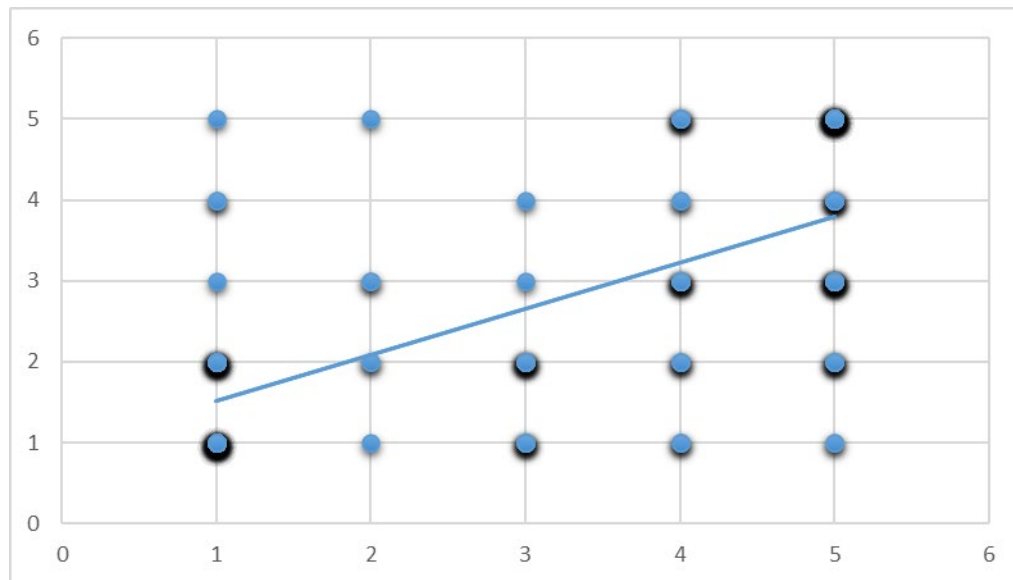

*Notes:* Figure display the correlation for the 2020 data (0.63) between the answers in the survey made by the NBHBP (2021) and the County Administrative board (2019, 2020). For the 2019 survey data, the correlation is a bit higher (0.67).

**References:**

County Administrative Board in Jönköping (2019). Lägesbilder från kommuner och regioner 2019 - Mottagande av asylsökande, nyanlända och ensamkommande barn.

County Administrative Board in Jönköping (2020). Lägesbilder från kommuner och regioner 2020 - Mottagande av asylsökande, nyanlända och ensamkommande barn.

Kolada (2021). Kolada - Den öppna och kostnadsfria databasen för kommuner och regioner. Available at: <https://www.kolada.se/>.

National Board of Housing, Building and Planning NBHBP (2021). Bostadsmarknadsenkäten 2020. Available at: <https://www.boverket.se/sv/samhallsplanering/bostadsmarknad/bostadsmarknaden/bostadsmarknadsenkaten/>.

Statistics Sweden SCB (2021). Statistikdatabasen. Available at: <https://www.statistikdatabasen.scb.se/pxweb/sv/ssd/>.

Swedish Migration Agency SMA (2021). Statistik. Available at: <https://www.migrationsverket.se/Om-Migrationsverket/Statistik.html>.
